# Supplementary material for: Dissecting Heterosis During the Ear Inflorescence Development Stage in Maize via a Metabolomics-based Analysis
Source: PubMed Central journal article supplement (PMC6338801; doi:10.1038/s41598-018-36446-5), 2019-01-18
Supplement: 41598_2018_36446_MOESM1_ESM.pdf [file 41598_2018_36446_MOESM1_ESM.pdf]

# **Dissecting Heterosis During the Ear Inflorescence Development Stage in Maize *via* a Metabolomics-based Analysis**

**Xia Shi<sup>1\*</sup>, Xuehai Zhang<sup>1\*</sup>, Dakun Shi<sup>1</sup>, Xiangge Zhang<sup>1</sup>, Weihua Li<sup>1</sup> +, Jihua Tang<sup>1,2</sup> +**

<sup>1</sup>National Key Laboratory of Wheat and Maize Crop Science, Henan Agricultural University, Zhengzhou 450002, China

<sup>2</sup>Hubei Collaborative Innovation Center for Grain Industry, Yangtze University, Jingzhou 434025, China

+ Corresponding authors:

Jihua Tang

Tel.: +86-371-56990188

E-mail: [tangjihua1@163.com](mailto:tangjihua1@163.com)

Weihua Li

Tel.: +86-371-56990188

E-mail: [liwh416@163.com](mailto:liwh416@163.com)

\* Xia Shi and Xuehai Zhang contributed equally to this work.

## SUPPLEMENTAL INFORMATION

This file includes Supplemental Figure S1-2 and Table S1-5.

Supplementary Figure S1. Sequential fine mapping of *hIEW2b*.

Supplementary Figure S2. Hierarchical clustering analysis of metabolomics data.

Supplementary Table S1. Functional annotation of candidate genes in the mapping region of *hIEW2b*.

Supplementary Table S2. Maize ear traits of Ix9801 and sub-CSSL<sub>16</sub> in two environments.

Supplementary Table S3. The heterotic effects analysis for *hIEW2b* on ear width trait in the testcross of Zheng58 × sub-CSSL<sub>16</sub>.

Supplementary Table S4. Molecular markers developed for fine mapping of *hIEW2b* on chromosome 2.

Supplementary Table S5. Primers used for detecting relative gene expression level.

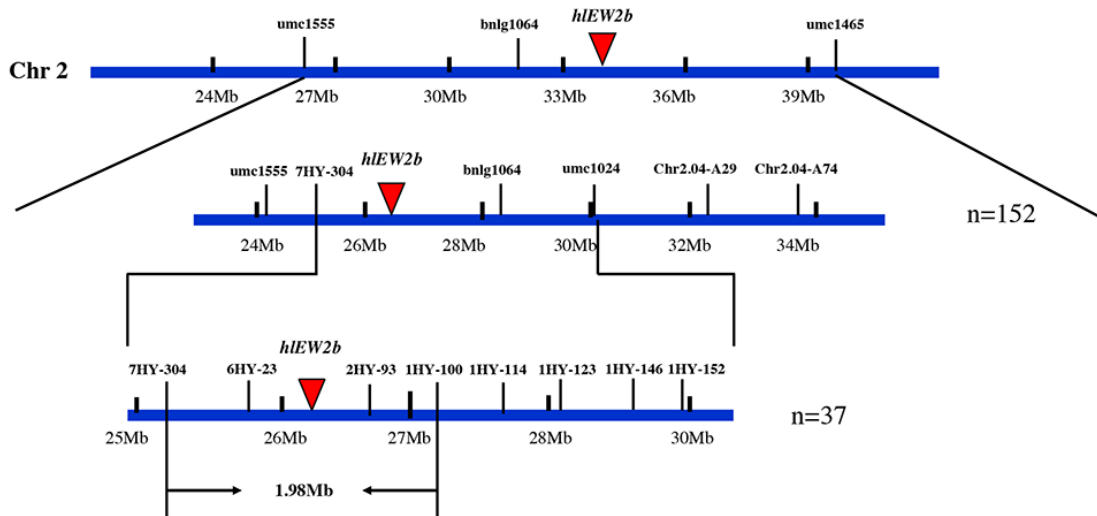

**Supplementary Figure S1. Sequential fine mapping of *hIEW2b*.** Locations of the fine-mapped regions on chromosome 2 are presented. The *hIEW2b* locus was roughly mapped between the simple sequence repeat markers 7HY-304 and *umc1024* on chromosome 2, and subsequently fine-mapped between markers 7HY-304 and 1HY-100, with a physical distance of 1.98 Mb.

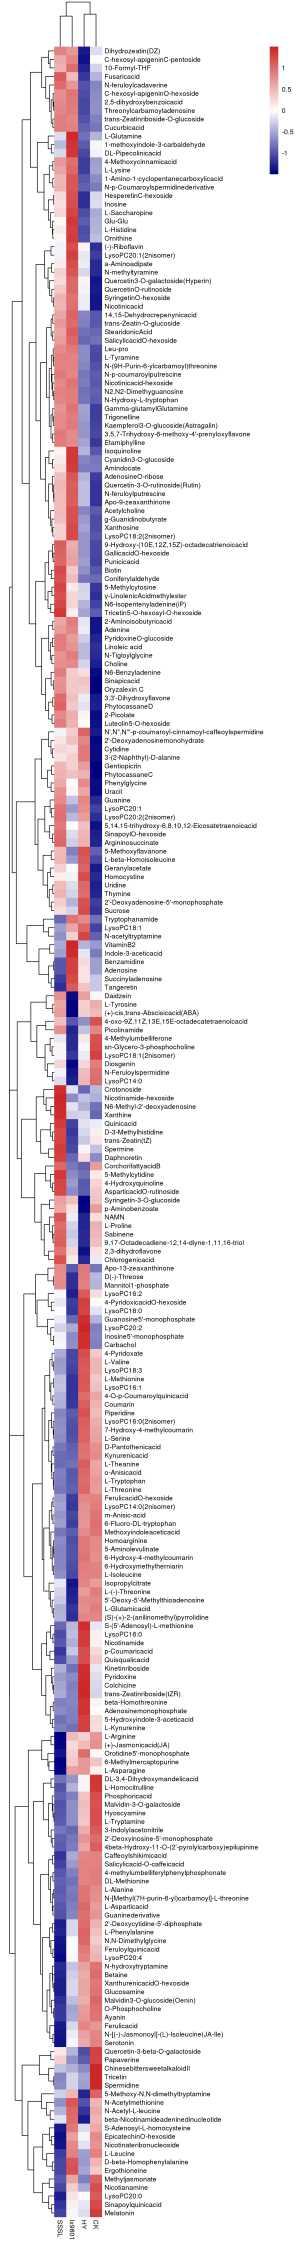

Heatmap showing relative metabolite abundance across three samples: H2O, H2, and H4. The color scale ranges from -1 (blue) to 1 (red). The y-axis lists 1000 metabolites, including various amino acids, sugars, and organic acids.

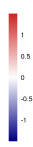

H2O  
H2  
H4

**Supplementary Figure S2. Hierarchical clustering analysis of metabolomics data.**

The heat map was plotted using the  $\log_2$ -transformed mean values of metabolomics data.

**Supplementary Table S1. Functional annotation of candidate genes in the mapping region of *hlEW2b*.**

| Chr. | Candidate genes | Annotation <sup>a</sup>                                                         |
|------|-----------------|---------------------------------------------------------------------------------|
| 2    | Zm00001d002872  | Unknown                                                                         |
| 2    | Zm00001d002873  | UPF0426 protein chloroplastic                                                   |
| 2    | Zm00001d002874  | OSJNBa0038O10.24 protein                                                        |
| 2    | Zm00001d002875  | Encodes alpha-helical IF (intermediate filament)-like protein.                  |
| 2    | Zm00001d002876  | Regulator of chromosome condensation (RCC1) family with FYVE zinc finger domain |
| 2    | Zm00001d002878  | Uncharacterized ACR YggU family COG1872 containing protein expressed            |
| 2    | Zm00001d002879  | Unknown                                                                         |
| 2    | Zm00001d002880  | Isopropylmalate dehydrogenase 2                                                 |
| 2    | Zm00001d002881  | Putative pentatricopeptide repeat-containing protein                            |
| 2    | Zm00001d002882  | SKP1-interacting partner 15                                                     |
| 2    | Zm00001d002884  | Integral membrane protein                                                       |
| 2    | Zm00001d002885  | Putative CCR4-associated factor 1 homolog 3                                     |
| 2    | Zm00001d002886  | Unknown                                                                         |
| 2    | Zm00001d002887  | Unknown                                                                         |
| 2    | Zm00001d002888  | MtN21 nodulin protein-like                                                      |

|   |                |                                                 |
|---|----------------|-------------------------------------------------|
| 2 | Zm00001d002889 | Soluble inorganic pyrophosphatase               |
| 2 | Zm00001d002890 | Unknown                                         |
| 2 | Zm00001d002891 | Chaperone DnaJ-domain superfamily protein       |
| 2 | Zm00001d002893 | WAT1-related protein                            |
| 2 | Zm00001d002896 | TUB-transcription factor 4                      |
| 2 | Zm00001d002897 | Peroxidase 14                                   |
| 2 | Zm00001d002898 | Peroxidase 12                                   |
| 2 | Zm00001d002899 | Peroxidase 12                                   |
| 2 | Zm00001d002900 | Unknown                                         |
| 2 | Zm00001d002901 | Peroxidase 12                                   |
| 2 | Zm00001d002902 | Peroxidase 12                                   |
| 2 | Zm00001d002904 | PLC-like phosphodiesterases superfamily protein |
| 2 | Zm00001d002905 | Protein kinase superfamily protein              |
| 2 | Zm00001d002906 | Unknown                                         |
| 2 | Zm00001d002907 | RNA polymerase II Rpb4 core protein             |
| 2 | Zm00001d002912 | Glyoxal oxidase-related protein                 |
| 2 | Zm00001d002915 | RNA polymerase II Rpb4 core protein             |
| 2 | Zm00001d002916 | Glyoxal oxidase-related protein                 |
| 2 | Zm00001d002917 | RNA-binding region RNP-1                        |

|   |                |                                                         |
|---|----------------|---------------------------------------------------------|
| 2 | Zm00001d002919 | Tetratricopeptide repeat (TPR)-like superfamily protein |
| 2 | Zm00001d002922 | Inositol polyphosphate multi kinase beta                |
| 2 | Zm00001d002925 | AP-4 complex subunit mu                                 |
| 2 | Zm00001d002928 | DUF740 family protein                                   |
| 2 | Zm00001d002929 | Auxin response factor 17                                |
| 2 | Zm00001d002930 | Unknown                                                 |
| 2 | Zm00001d002933 | DDB1- and CUL4-associated factor homolog 1              |
| 2 | Zm00001d002934 | NAC domain-containing protein 30                        |

---

a) Annotations were obtained from MaizeGDB databases ([http:// www.maizegdb.org](http://www.maizegdb.org)).



**Supplementary Table S2. Maize ear traits of Ix9801 and sub-CSSL<sub>16</sub> in two environments.**

| Traits                | Environments | Parents    |                        |          |
|-----------------------|--------------|------------|------------------------|----------|
|                       |              | Ix9801     | sub-CSSL <sub>16</sub> | P-value  |
| Ear width(mm)         | E1           | 48.38±1.44 | 48.44±1.04             | 9.42E-01 |
|                       | E2           | 46.84±3.05 | 47.01±2.01             | 9.22E-01 |
| Ear length(cm)        | E1           | 11.86±2.34 | 11.95±1.66             | 8.06E-01 |
|                       | E2           | 12.03±2.79 | 12.18±1.14             | 5.79E-01 |
| Kernel row number     | E1           | 12.40±0.89 | 13.20±1.09             | 2.42E-01 |
|                       | E2           | 13.20±0.89 | 12.80±1.10             | 5.80E-01 |
| Kernel number per row | E1           | 24.00±2.65 | 22.80±1.30             | 3.90E-01 |
|                       | E2           | 23.40±2.07 | 23.00±1.08             | 7.40E-01 |
| Ear weight(g)         | E1           | 87.45±2.46 | 83.63±5.94             | 2.79E-01 |
|                       | E2           | 90.42±1.91 | 91.04±4.85             | 7.97E-01 |

E1 and E2 are Xinxiang 2015, Changge 2015, China, respectively.

\*, \*\* indicate significant differences at the 0.05 and 0.01 probability level.

**Supplementary Table S3. The heterotic effects analysis for *hIEW2b* on ear width trait in the testcross of Zheng58 × sub-CSSL16.**

| Traitsa        | Mean±SD    |           |                      | d/ab  | Mode of effectc |
|----------------|------------|-----------|----------------------|-------|-----------------|
|                | sub-CSSL16 | Zheng58   | Zheng58 × sub-CSSL16 |       |                 |
| Ear width (mm) | 48.44±1.04 | 48.58±0.9 | 52.7±1.30            | 59.86 | OD              |

a) Phenotype of ear width was collected in Xinxiang 2015.

b) The ratio of the estimated dominance to the absolute value of additive effect ( $d/a$ , degree of dominance)  $>1$ ,  $=1$ ,  $<1$  were regarded as exhibiting overdominance (OD), dominance (D) and partial-dominance (PD), respectively.

c) Mode of genetic effect manifestation.

**Supplementary Table S4. Molecular markers developed for fine mapping of *hIEW2b* on chromosome 2.**

| Marker      | AGP v4 position | Forward Primer           | Reverse Primer           |
|-------------|-----------------|--------------------------|--------------------------|
| umc1555     | 25121821        | ATAAAACGAACGACTCTCTCACCG | ATATGTCTGACGAGCTTCGACACC |
| 7HY-304     | 25177782        | ACGTGGTCAATTGCACAGAC     | TGTCGCGCTTGTAACCAAAA     |
| 6HY-23      | 25651399        | GGGAAGGAGTGGAGGTGGT      | TGCATACCCGACTAGCAGTTC    |
| 2HY-93      | 26045713        | CTACCTCTTCGCCTCCGC       | CCATTTCGCTTTTGCCCT       |
| 1HY-100     | 27934745        | GTAGTTTGCTGCTTTTTTGTGTT  | CTTGATTCGCTCTCTTAGTTCCT  |
| 1HY-114     | 28088080        | CCCGCTTAGGTATCTATCTGC    | ATCTTCTGGTTCTGCCGTGA     |
| 1HY-123     | 28153007        | CAAATCCAGAAGGAAGAAAAACT  | TAGAACGGAGAGGAGCACAAAG   |
| bnlg1064    | 28258664        | CTGGTCCGAGATGATGGC       | TCCATTTCTGCATCTGCAAC     |
| 1HY-146     | 29463038        | CACGGGATTGTGGTAGTAAAAG   | TTCTGGAGGTTGTTATTTGCC    |
| 1HY-152     | 29467416        | GAGAACC AAAACGGCAAGAA    | AGCGGACTACTGCTGACCAT     |
| umc1024     | 30533873        | CCTTTTTTCGCCTCGCTTTTTTAT | TCGTCGTCTCCAATCATACTG    |
| Chr2.04-A29 | 32857673        | CCTTTGCTGCTTTGCGACT      | GCGTTGGGACCCTACTCG       |
| Chr2.04-A74 | 33353765        | GACCCCAACAAACCAGTG       | CACTTCCCCTCCGTCCC        |
| umc1465     | 39701635        | GTACTTCAAAGCACATGAATGCGA | AGTCTCGACTGCCAATTTACAAA  |

**Supplementary Table S5. Primers used for detecting relative gene expression level.**

| Gene ID        | Forward Primers        | Reverse Primers       |
|----------------|------------------------|-----------------------|
| Zm00001d011699 | GCCTGTGGCCATTCAATTAC   | GGTACCAAAGCAGGAGACGA  |
| Zm00001d013140 | AGTACATGCGAATGCGACAG   | CACATCCTTGACGGTGATGA  |
| Zm00001d034023 | CACAGGCCCAGAATTTGATT   | TGAAATTCCACCATCAGCAA  |
| Zm00001d034320 | GTTGGAAGAGGACAGGCAAC   | AGCTAAAAAGCTGCCCATCA  |
| Zm00001d026685 | CCCCGAGGTTACACATTCAG   | ACCACCTGACAATGCACAGA  |
| Zm00001d030895 | CTTTGAGGAAGCCGAAGAAG   | TGTTCCACCGGTAGCAATAAG |
| Zm00001d041352 | GGGATTGCCTCCTCCATC     | GCAACTACGGTGATCCCTTG  |
| Zm00001d007094 | GCTTTTGGATGGTGTCAAAA   | ATTGCCAGAAAGGTCAATGC  |
| Zm00001d003017 | GCTTCAAATTCCTGGTGCAT   | GCCGCAGACAAGTTAGCAAT  |
| Zm00001d017271 | ATTGAGGAGATTGCTTTGAAGA | CTCCTTGGGCAATAGGATCA  |
| Zm00001d007180 | CGCTGTTCCCACACTACGAG   | GTAGGAGCTCTTGCCGAGGT  |
| Zm00001d029031 | GGTGCTGCCCTACTACGAGA   | TAGGAGCTCTTGCCGAGGT   |
| Zm00001d022254 | ACTGCTTCCAAGGGATCGTC   | AGCGCCTCCTTGATGTTGT   |
| Zm00001d008376 | CTGGGCCTCACCCTACCT     | ACAAAGCTTGCGATCCTCAG  |
| Zm00001d051927 | CTTGCTCGAGTCATTCACCA   | TTGGCACAATCTCATCAACC  |
| $\beta$ -Actin | CAATGGCACTGGAATGGT     | ATCTTCAGGCGAAACACG    |
